# Supplementary figures and images for: Quantification of metal ion induced DNA damage with single cell array based assay
Source: Royal Society of Chemistry journal article supplement (doi:10.1039/c3an00967j), 2013-01-01

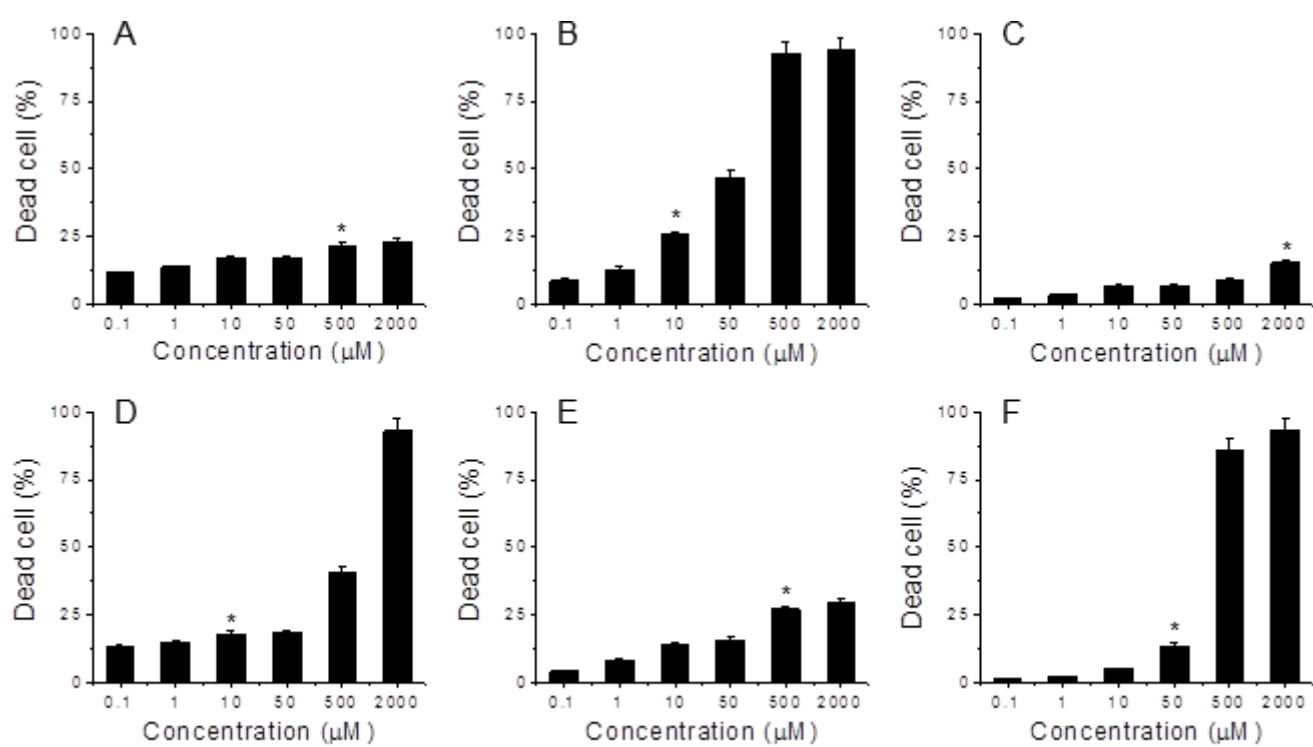

Supplement: c3an00967j.pdf [file c3an00967j.pdf]
